# Supplementary material for: A hierarchical monolithic cobalt-single-atom electrode for efficient hydrogen peroxide production in acid
Source: Royal Society of Chemistry journal article supplement (doi:10.1039/d2cy00427e), 2022-01-01
Supplement: d2cy00427e1.pdf [file d2cy00427e1.pdf]

**A hierarchical monolithic Co-single-atom electrode for efficient hydrogen peroxide production in acid**

Jie Ding<sup>a</sup>, Jian Huang<sup>a</sup>, Qiao Zhang<sup>a</sup>, Zhiming Wei<sup>a</sup>, Qinye He<sup>a</sup>, Zhaoyang Chen<sup>a</sup>, Yuhang Liu<sup>b,c</sup>, Xiaozhi Su<sup>\*b</sup>, and Yueming Zhai<sup>\*a</sup>

<sup>a</sup> The Institute for Advanced Studies, Wuhan University, Wuhan, 430072, China

<sup>b</sup> Shanghai Synchrotron Radiation Facility, Shanghai Advanced Research Institute, Chinese Academy of Sciences, Shanghai 201204, China

<sup>c</sup> School of Physical Science & Technology, Suzhou University of Science and Technology, Suzhou 215009, China

E-mail: [yueming@whu.edu.cn](mailto:yueming@whu.edu.cn)

[suxiaozhi@zjlab.org.cn](mailto:suxiaozhi@zjlab.org.cn)

**Preparation of Co<sub>1</sub>/NC.** A typical 3-electrode cell was constructed with graphene nanosheets/carbon paper as a working electrode, a graphite rod as a counter electrode, and a saturated calomel electrode (SCE) as a reference electrode. The electrolyte is a mixture solution containing 4.5 mL of HNO<sub>3</sub>, 3.4 mL of aniline, and 42.1 mL of water. Aniline was polymerized onto the surface of graphene nanosheets by a potentiostatic method (0.7 V, 120s) in the cell, and PANI/GN was obtained. Then, PANI/GN was washed thoroughly and dried at 60 °C overnight. Next, PANI/GN was vertically placed in the K<sub>3</sub>[Co(CN)<sub>6</sub>] solution at 45 °C for 4h under stirring to trap Co atoms. Again, this precursor should be washed thoroughly and dried. Calcination process was conducted at 750 °C under Ar atmosphere with a ramp rate of 1.5 °C/min and the temperature was kept for 2h, followed by acid leaching. The obtained sample was denoted as Co<sub>1</sub>/NC.

**Preparation of NC.** The synthesis procedure of NC is the same as the preparation of Co<sub>1</sub>/NC except the step of introduction of Co atoms.

**Characterization.** The morphology was collected by FESEM (JEOL JSM-6700F) and TEM (JEOL JEM-2100F). Sub-angstrom-resolution high-angle annular dark-field scanning transmission electron microscopy (HAADF-STEM) was performed on a JEOL JEMARM200F STEM/TEM. The crystal structure was examined by XRD (Bruker AXS D8 Advance). The mass content of Co in Co<sub>1</sub>/NC was measured by ICP-OES (PerkinElmer). XPS was conducted on an ESCALAB 250 photoelectron spectrometer (Thermo Fisher Scientific) using a monochromatic Al K $\alpha$  X-ray beam (1486.6 eV). All binding energies were calibrated to the C 1s peak (284.6 eV) arising from the adventitious carbon-containing species. X-ray absorption spectroscopy (XAS) was collected by employing synchrotron radiation light source at BL14W1 beamline of Shanghai Synchrotron Radiation Facility (SSRF) at room temperature. Energy calibration was performed with a Co foil standard by shifting all spectra to a glitch in the incident intensity.

**Electrochemical measurements.** A three-electrode system was employed to measure the electrochemical performance in an H-type cell. The measurements were conducted on CHI 660E workstation with a graphite rod as a counter electrode and a saturated Ag/AgCl as a reference electrode. 0.1 M O<sub>2</sub>-saturated HClO<sub>4</sub> was used as the electrolyte.

**Device assembly.** The flow cell contains three components: the cathode part, the anode part, and the membrane. The whole cell is filled with 0.1 M HClO<sub>4</sub>.

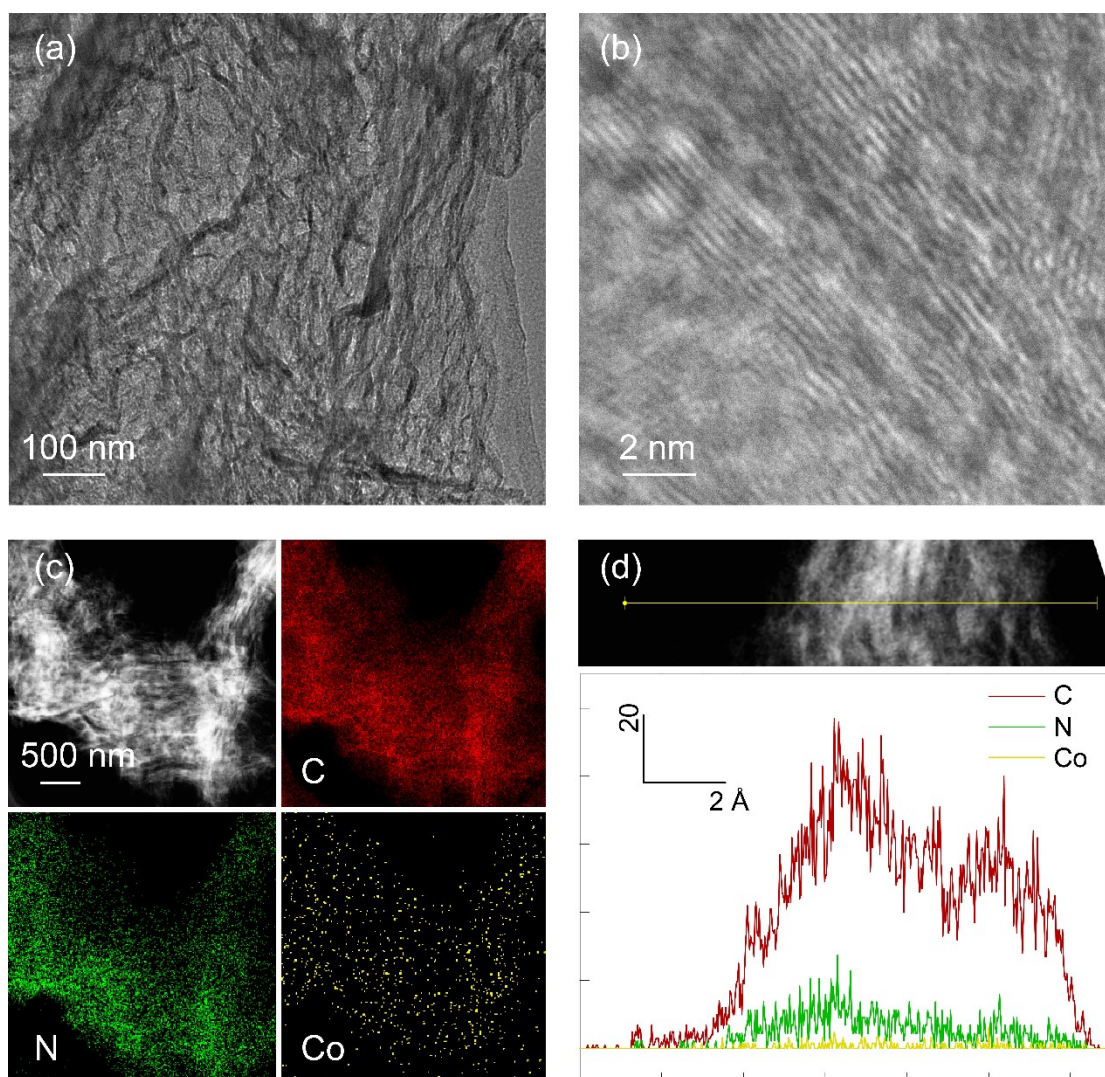

**Figure S1** (a-b) TEM images of Co<sub>1</sub>/NC. (c) EDS elemental mappings of Co<sub>1</sub>/NC. (d) Line scans of Co<sub>1</sub>/NC.

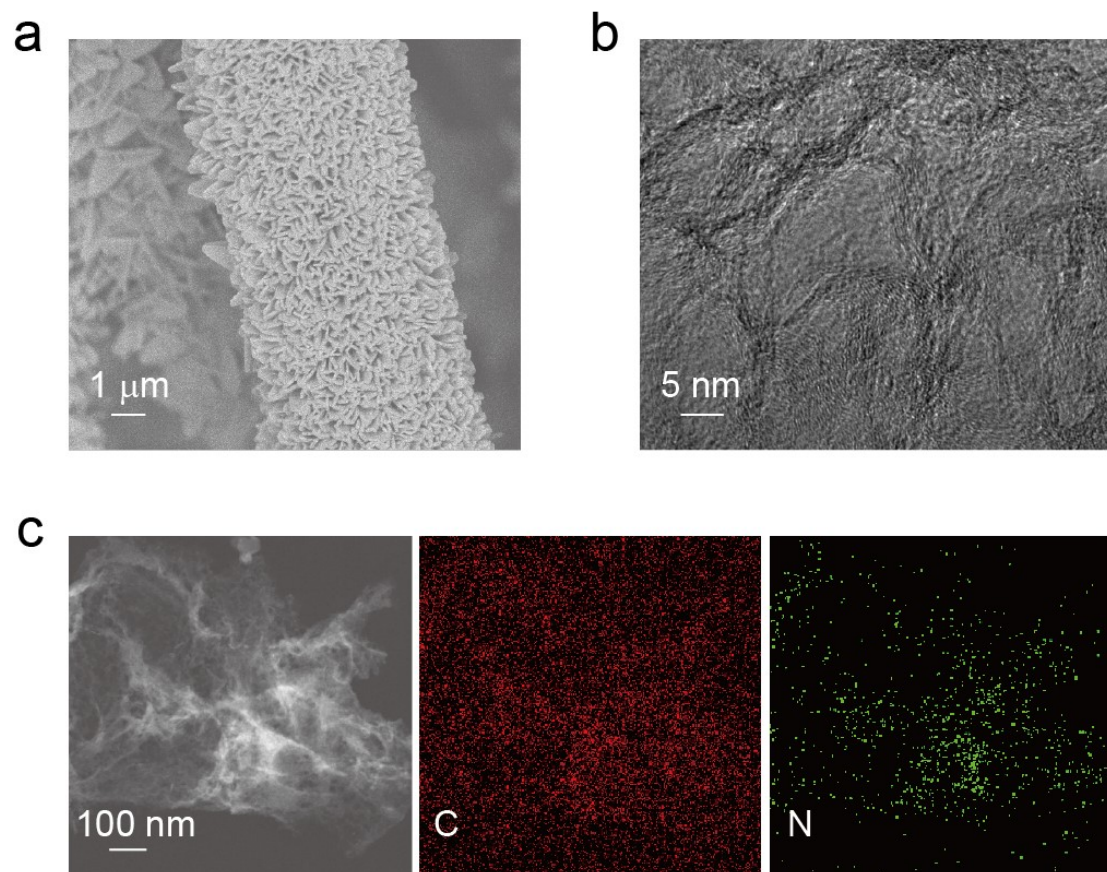

**Figure S2.** SEM (a), HR-TEM (b) and EDS elemental mappings (c) images of NC.

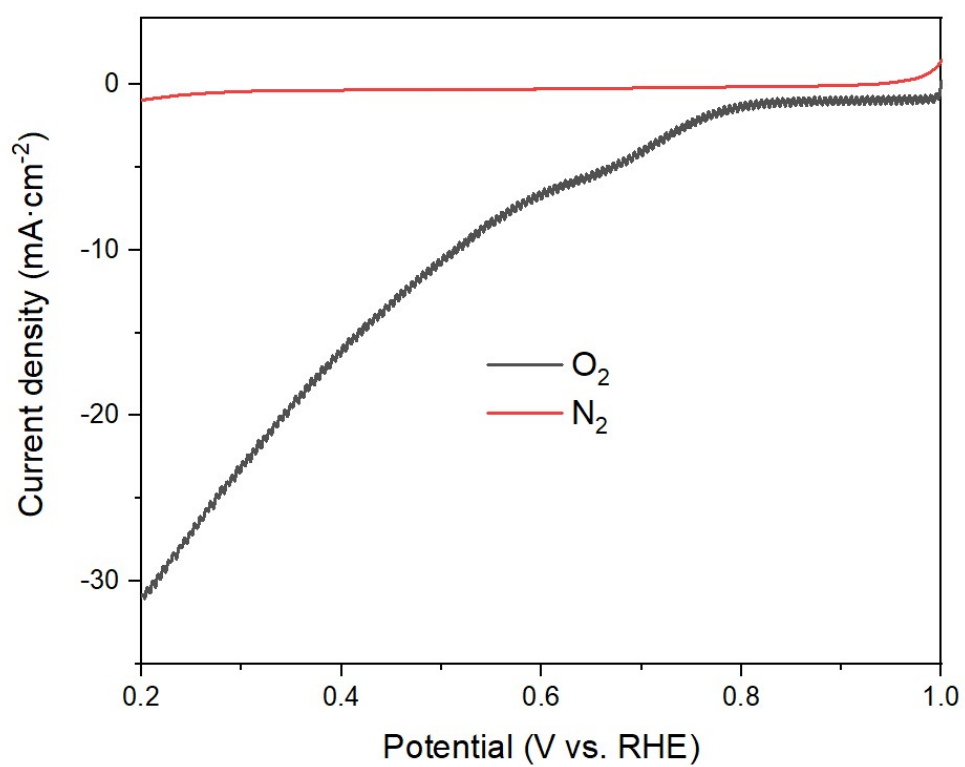

**Figure S3** LSV curves of Co<sub>1</sub>/NC measured in N<sub>2</sub>-saturated and O<sub>2</sub>-saturated solution.

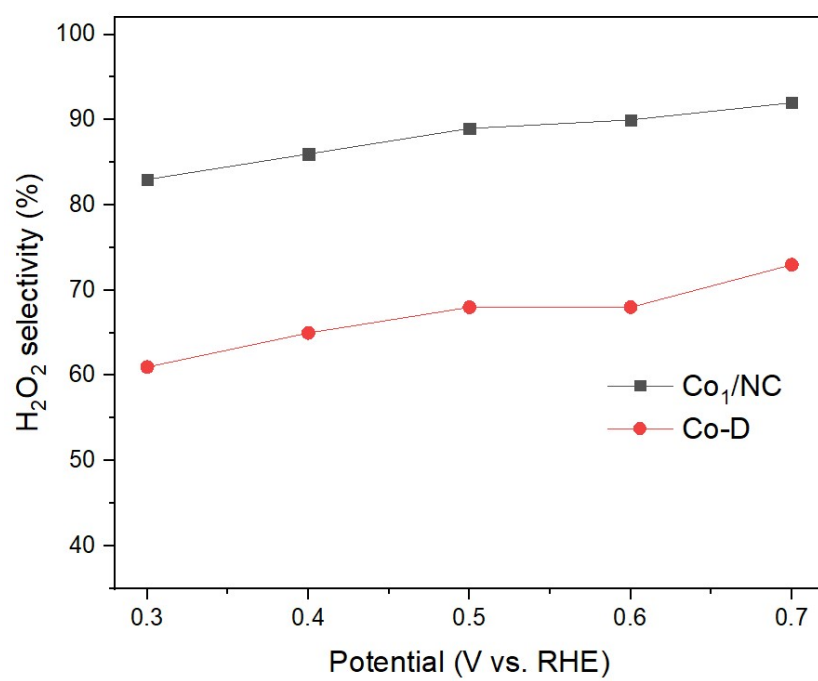

**Figure S4** H<sub>2</sub>O<sub>2</sub> selectivity of Co<sub>1</sub>/NC and Co-D.

**Table S1** Fitting parameters of the EXAFS of the Co<sub>l</sub>/NC.

| name    | N       | S02     | sigma^2 | e0     | delr     | Reff    | R       |
|---------|---------|---------|---------|--------|----------|---------|---------|
| Co(K)-N | 0.900   | 4.020   | 0.00793 | -5.573 | -0.01989 | 1.90000 | 1.88011 |
| name    | ei      | third   | fourth  |        |          |         |         |
| Co(K)-N | 0.00000 | 0.00000 | 0.00000 |        |          |         |         |

**Table S2** Performance of various H<sub>2</sub>O<sub>2</sub> flow cells.

| Catalyst                        | Production rate (mol/kg <sub>cat</sub> /h) | Ref       |
|---------------------------------|--------------------------------------------|-----------|
| Co <sub>I</sub> /NC             | 606                                        | This work |
| CoN <sub>2</sub> C <sub>x</sub> | 117                                        | [1]       |
| 2.5% Pd/XC-72                   | 129                                        | [2]       |
| Au@SiO <sub>2</sub>             | 24.8                                       | [3]       |

**References**

- 1□ I. Yamanaka, S. Tazawa, T. Murayama, T. Iwasaki, S. Takenaka, *Chemsuschem: Chem. & Sus. Energy & Mater.* 2010, **3**, 59-62.
- 2□ B. Hu, W. Deng, R. Li, Q. Zhang, Y. Wang, F. Delplanque-Janssens, D. Paul, F. Desmedt, P. Miquel, *J. Catal.* 2014, **319**, 15-26.
- 3□ L. Ouyang, L. Tan, J. Xu, P.-F. Tian, G.-J. Da, X.-J. Yang, D. Chen, F. Tang, Y.-F. Han, *Catal. Today* 2015, **248**, 28-34.
